# Supplementary material for: Mapping near-real-time soil moisture dynamics over Tasmania with transfer learning
Source: Copernicus journal article supplement (doi:10.5194/soil-11-287-2025), 2025-04-08
Supplement: Supplementary file 1 [file soil-11-287-2025-supplement.pdf]

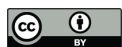

*Supplement of*

## **Mapping near-real-time soil moisture dynamics over Tasmania with transfer learning**

**Marliana Tri Widyastuti et al.**

*Correspondence to:* Marliana Tri Widyastuti ([marlianatri.widyastuti@sydney.edu.au](mailto:marlianatri.widyastuti@sydney.edu.au))

The copyright of individual parts of the supplement might differ from the article licence.

## Supplementary Materials

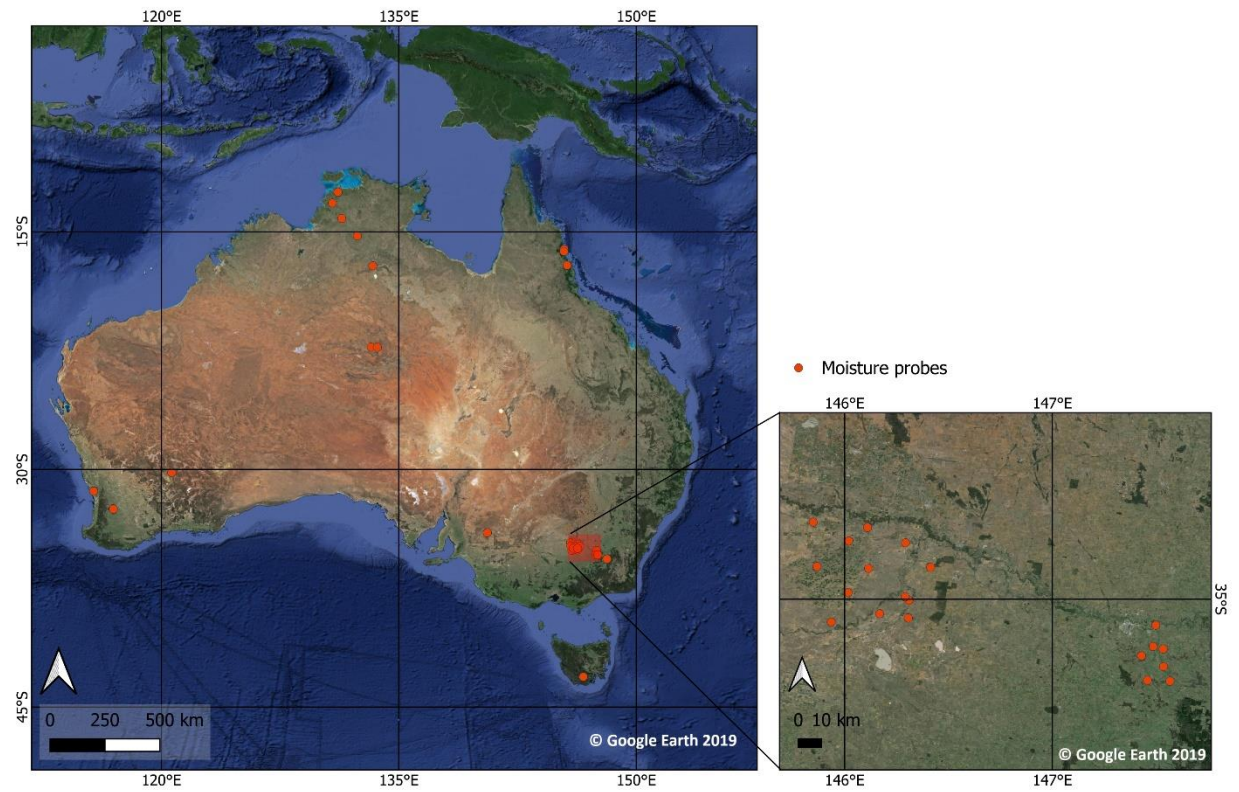

**Figure S1: Location of soil moisture monitoring stations in Australia.**
